# Supplementary material for: Breast and prostate cancers harbor common somatic copy number alterations that consistently differ by race and are associated with survival
Source: PubMed Central journal article supplement (PMC7441621; doi:10.1186/s12920-020-00765-2), 2020-08-20
Supplement: 12920_2020_765_MOESM2_ESM.pdf [file 12920_2020_765_MOESM2_ESM.pdf]

**Table S1. Somatic copy number alterations (SCNAs) in TCGA breast tumors (n=886) that differ significantly by race.**

| <b>Chromosome number: base pair position start-end*</b> | <b>Length in megabases</b> | <b>SCNA type</b> | <b>Cytoband</b> | <b>Beta Coefficient†</b> | <b>SE</b> | <b>T-statistic</b> | <b>P-value</b> |
|---------------------------------------------------------|----------------------------|------------------|-----------------|--------------------------|-----------|--------------------|----------------|
| 3:154227886-169450068                                   | 15.22                      | Amp              | q25.2-q26.2     | 0.026                    | 0.016     | 1.61               | 0.107          |
| 3:169450069-171879450                                   | 2.43                       | Amp              | q26.2-q26.31    | 0.035                    | 0.019     | 1.91               | 0.057          |
| 4:109489756-109493251                                   | 0.00                       | Del              | q25             | -0.017                   | 0.009     | -1.79              | 0.074          |
| 4:176731730-182822332                                   | 6.09                       | Del              | q34.2-q34.3     | -0.034                   | 0.018     | -1.86              | 0.064          |
| 4:182822333-191154275                                   | 8.33                       | Del              | q34.3-q35.2     | -0.031                   | 0.013     | -2.37              | 0.018          |
| 4:3369932-3431340                                       | 0.06                       | Del              | p16.3           | -0.032                   | 0.017     | -1.89              | 0.059          |
| 5:160562330-165741478                                   | 5.18                       | Del              | q34             | -0.070                   | 0.019     | -3.68              | 0.000          |
| 5:51204966-51924477                                     | 0.72                       | Del              | q11.2           | -0.055                   | 0.020     | -2.76              | 0.006          |
| 5:51924478-88003401                                     | 36.08                      | Del              | q11.2-q14.3     | -0.083                   | 0.019     | -4.34              | 0.000          |
| 5:88003402-114971116                                    | 26.97                      | Del              | q14.3-q22.3     | -0.087                   | 0.019     | -4.67              | 0.000          |
| 6:105142579-105544119                                   | 0.40                       | Amp              | q16.3-q21       | 0.066                    | 0.028     | 2.34               | 0.020          |
| 6:105544120-107830797                                   | 2.29                       | Amp              | q21             | 0.074                    | 0.031     | 2.42               | 0.016          |
| 6:107830798-108690475                                   | 0.86                       | Amp              | q21             | 0.061                    | 0.030     | 2.00               | 0.046          |
| 6:152481982-170769426                                   | 18.29                      | Del              | q25.1-q27       | 0.038                    | 0.022     | 1.79               | 0.075          |
| 6:170769427-171115066                                   | 0.35                       | Del              | q27             | 0.019                    | 0.009     | 2.18               | 0.029          |
| 6:21312556-22614340                                     | 1.30                       | Amp              | p22.3           | 0.035                    | 0.021     | 1.70               | 0.089          |
| 6:2232105-4756175                                       | 2.52                       | Del              | p25.3-p25.1     | 0.050                    | 0.021     | 2.41               | 0.016          |
| 6:22614341-22817848                                     | 0.20                       | Amp              | p22.3           | 0.036                    | 0.020     | 1.75               | 0.080          |
| 6:6754109-21312555                                      | 14.56                      | Amp              | p25.1-p22.3     | 0.057                    | 0.019     | 3.00               | 0.003          |
| 6:69393208-83933646                                     | 14.54                      | Del              | q12-q14.2       | 0.036                    | 0.020     | 1.86               | 0.063          |
| 6:99929476:152481981                                    | 52.55                      | Del              | q16.2-q25.1     | 0.037                    | 0.021     | 1.74               | 0.082          |
| 7:151140793-151976410                                   | 0.84                       | Del              | q36.1           | 0.035                    | 0.021     | 1.71               | 0.088          |
| 7:151981957:153770265                                   | 1.79                       | Del              | q36.1-q36.2     | 0.035                    | 0.020     | 1.76               | 0.079          |
| 7:32999602-33047676                                     | 0.05                       | Amp              | p14.3           | -0.034                   | 0.015     | -2.28              | 0.023          |
| 8:1-37953889                                            | 37.95                      | Del              | p23.3-p11.23    | -0.045                   | 0.027     | -1.67              | 0.095          |
| 8:61177663-146364021                                    | 85.19                      | Amp              | q12.1-q24.3     | 0.070                    | 0.028     | 2.51               | 0.012          |
| 9:1-18127677                                            | 18.13                      | Del              | p24.3-p22.2     | 0.035                    | 0.021     | 1.70               | 0.090          |

**Table S1. Somatic copy number alterations (SCNAs) in TCGA breast tumors (n=886) that differ significantly by race.**

| <b>Chromosome number: base pair position start-end*</b> | <b>Length in megabases</b> | <b>SCNA type</b> | <b>Cytoband</b> | <b>Beta Coefficient†</b> | <b>SE</b> | <b>T-statistic</b> | <b>P-value</b> |
|---------------------------------------------------------|----------------------------|------------------|-----------------|--------------------------|-----------|--------------------|----------------|
| 9:22147714-30113862                                     | 7.97                       | Del              | p21.3-p21.1     | 0.057                    | 0.024     | 2.45               | 0.015          |
| 10:1-3730104                                            | 3.73                       | Amp              | p15.3-p15.2     | 0.072                    | 0.018     | 3.99               | 0.000          |
| 10:3730105-6398980                                      | 2.67                       | Amp              | p15.2-p15.1     | 0.081                    | 0.021     | 3.91               | 0.000          |
| 10:61852107-62575303                                    | 0.72                       | Amp              | q21.2           | 0.053                    | 0.021     | 2.57               | 0.011          |
| 10:6398981-14643449                                     | 8.24                       | Amp              | p15.1-p13       | 0.086                    | 0.020     | 4.30               | 0.000          |
| 11:1-766166                                             | 0.77                       | Del              | p15.5           | -0.021                   | 0.008     | -2.64              | 0.008          |
| 11:64592727-65674138                                    | 1.08                       | Del              | q13.1           | -0.038                   | 0.018     | -2.14              | 0.033          |
| 11:65766045-66641072                                    | 0.88                       | Amp              | q13.1-q13.2     | -0.053                   | 0.022     | -2.46              | 0.014          |
| 11:66641073-68027183                                    | 1.39                       | Amp              | q13.2           | -0.048                   | 0.025     | -1.93              | 0.054          |
| 11:68027184-68168228                                    | 0.14                       | Amp              | q13.2           | -0.075                   | 0.027     | -2.77              | 0.006          |
| 11:74235492-135006515                                   | 60.77                      | Del              | q13.4-q25       | -0.037                   | 0.019     | -1.94              | 0.052          |
| 11:766167-11684113                                      | 10.92                      | Del              | p15.5-p15.3     | -0.047                   | 0.018     | -2.65              | 0.008          |
| 12:11703865-12303099                                    | 0.60                       | Amp              | p13.2           | 0.040                    | 0.025     | 1.62               | 0.105          |
| 12:1-2306551                                            | 2.31                       | Amp              | p13.33          | 0.024                    | 0.013     | 1.78               | 0.076          |
| 13:30777606-30978054                                    | 0.20                       | Amp              | q12.3           | -0.050                   | 0.024     | -2.11              | 0.035          |
| 13:31949050-38243466                                    | 6.29                       | Del              | q12.3-q13.3     | -0.044                   | 0.022     | -2.03              | 0.042          |
| 13:38243467-52321574                                    | 14.08                      | Del              | q13.3-q14.3     | -0.051                   | 0.022     | -2.34              | 0.020          |
| 13:52321575-59628349                                    | 7.31                       | Del              | q14.3-q21.2     | -0.048                   | 0.022     | -2.23              | 0.026          |
| 14:66905865-67198116                                    | 0.29                       | Del              | q23.3           | -0.054                   | 0.018     | -2.93              | 0.004          |
| 14:67198117-70999022                                    | 3.80                       | Del              | q23.3-q24.2     | -0.054                   | 0.019     | -2.88              | 0.004          |
| 14:70999023-97705236                                    | 26.71                      | Del              | q24.2-q32.2     | -0.036                   | 0.018     | -2.02              | 0.043          |
| 15:1-37513451                                           | 37.51                      | Del              | p13-q14         | -0.013                   | 0.007     | -1.88              | 0.060          |
| 15:37513452-43466475                                    | 5.95                       | Del              | q14-q15.2       | -0.046                   | 0.018     | -2.53              | 0.012          |
| 16:55240635-58196161                                    | 2.96                       | Del              | q12.2-q21       | 0.046                    | 0.025     | 1.88               | 0.060          |
| 16:58196162-90354752                                    | 32.16                      | Del              | q21-q24.3       | 0.066                    | 0.023     | 2.83               | 0.005          |
| 17:45603013-45969605                                    | 0.37                       | Amp              | q21.32          | -0.039                   | 0.023     | -1.73              | 0.084          |
| 19:1-4677580                                            | 4.68                       | Del              | p13.3           | -0.035                   | 0.015     | -2.37              | 0.018          |

**Table S1. Somatic copy number alterations (SCNAs) in TCGA breast tumors (n=886) that differ significantly by race.**

| <b>Chromosome number: base pair position start-end*</b> | <b>Length in megabases</b> | <b>SCNA type</b> | <b>Cytoband</b> | <b>Beta Coefficient†</b> | <b>SE</b> | <b>T-statistic</b> | <b>P-value</b> |
|---------------------------------------------------------|----------------------------|------------------|-----------------|--------------------------|-----------|--------------------|----------------|
| 19:29282210-29315606                                    | 0.03                       | Amp              | q12             | 0.046                    | 0.022     | 2.12               | 0.035          |
| 19:29315607-31229637                                    | 1.91                       | Amp              | q12             | 0.076                    | 0.022     | 3.49               | 0.001          |
| 19:31229638-36069787                                    | 4.84                       | Amp              | q12-q13.12      | 0.053                    | 0.016     | 3.20               | 0.001          |
| 19:55573038-58776089                                    | 3.20                       | Amp              | q13.42-q13.43   | -0.032                   | 0.018     | -1.75              | 0.081          |

Abbreviations: SCNA=somatic copy number alteration; Del=deletion; Amp=amplification; AA=African American; EA=European American; SE=standard error of the beta coefficient.

\*Based on human genome build hg19

† Beta coefficient for the "race" term in the linear model "cnAUC=race+age+tumor pathology"

In amplified regions, a positive beta coefficient signifies a greater degree of amplification among AAs relative to EAs.

In deletion regions, a negative beta coefficient signifies a greater degree of DNA loss among AAs relative to EAs.
