# Supplementary material for: Breast and prostate cancers harbor common somatic copy number alterations that consistently differ by race and are associated with survival
Source: PubMed Central journal article supplement (PMC7441621; doi:10.1186/s12920-020-00765-2), 2020-08-20
Supplement: 12920_2020_765_MOESM4_ESM.pdf [file 12920_2020_765_MOESM4_ESM.pdf]

Table S3. Additional cross-tumor\* validation of the six race-differentiated SCNAs in TCGA.

| Breast and Prostate cancer SCNA discovery |                        |                               | Other cancer type SCNA validation |                                          |              |             |                       |              |             |              |       |       |
|-------------------------------------------|------------------------|-------------------------------|-----------------------------------|------------------------------------------|--------------|-------------|-----------------------|--------------|-------------|--------------|-------|-------|
| Cytoband†                                 | Chromosome position†   | Breast and prostate SCNA type | Cancer Type*                      | Chromosome position†                     | Length (Mb)  | SCNA type   | Beta coefficient†     | SE           | T-statistic | P-value      |       |       |
| 5q11.2-q14.1                              | 5:51204966-80506380    | Del                           | Endometrial                       | 5:50124857-63329958                      | 13.21        | Del         | -0.023                | 0.022        | -1.03       | 0.301        |       |       |
|                                           |                        |                               |                                   | 5:63329959-94282979                      | 30.95        | Del         | -0.016                | 0.021        | -0.80       | 0.426        |       |       |
|                                           |                        |                               | Ovarian                           | 5:45378457-55750914                      | 10.37        | Del         | 0.088                 | 0.037        | 2.37        | 0.018        |       |       |
|                                           |                        |                               |                                   | 5:55750915-59044767                      | 3.29         | Del         | 0.185                 | 0.082        | 2.27        | 0.024        |       |       |
|                                           |                        |                               |                                   | 5:59044768-62065114                      | 3.02         | Del         | 0.175                 | 0.071        | 2.48        | 0.014        |       |       |
|                                           |                        |                               |                                   | 5:62065115-125175058                     | 63.11        | Del         | 0.064                 | 0.056        | 1.13        | 0.258        |       |       |
|                                           |                        |                               | Lung                              | 5:52284387-58615497                      | 6.33         | Del         | -0.047                | 0.038        | -1.22       | 0.224        |       |       |
|                                           |                        |                               |                                   | 5:58615498-58707776                      | 0.09         | Del         | -0.042                | 0.037        | -1.13       | 0.260        |       |       |
|                                           |                        |                               |                                   | 5:58707777-64444922                      | 5.74         | Del         | -0.019                | 0.036        | -0.52       | 0.600        |       |       |
|                                           |                        |                               |                                   | 5:64444923-136407584                     | 71.96        | Del         | -0.016                | 0.034        | -0.47       | 0.641        |       |       |
|                                           |                        |                               | Kidney                            | NA                                       | NA           | NA          | NA                    | NA           | NA          | NA           | NA    | NA    |
|                                           |                        |                               |                                   | NA                                       | NA           | NA          | NA                    | NA           | NA          | NA           | NA    | NA    |
|                                           |                        |                               | 5q15-q21.1                        | 5:94139355-102688824                     | Del          | Endometrial | 5:63329959-94282979   | 30.95        | Del         | -0.016       | 0.021 | -0.80 |
| Ovarian                                   | 5:62065115-125175058   | 63.11                         |                                   |                                          |              | Del         | 0.064                 | 0.056        | 1.13        | 0.258        |       |       |
| Lung                                      | 5:64444923-136407584   | 71.96                         |                                   |                                          |              | Del         | -0.016                | 0.034        | -0.47       | 0.641        |       |       |
| Kidney                                    | 5:88862287-103693025   | 14.83                         |                                   |                                          |              | Amp         | -0.026                | 0.032        | -0.80       | 0.425        |       |       |
| 8q21.11-q21.8                             | 8:78097650-84211555    | Amp                           | Endometrial                       | NA                                       | NA           | NA          | NA                    | NA           | NA          | NA           |       |       |
|                                           |                        |                               | Ovarian                           | 8:65946564-115168901                     | 49.22        | Amp         | -0.144                | 0.061        | -2.38       | 0.018        |       |       |
|                                           |                        |                               | Lung                              | 8:64945035-93539198                      | 28.59        | Amp         | -0.027                | 0.041        | -0.66       | 0.507        |       |       |
|                                           |                        |                               | Kidney                            | NA                                       | NA           | NA          | NA                    | NA           | NA          | NA           |       |       |
| 8q21.3-q24.3                              | 8:90059223-144568457   | Amp                           | Endometrial                       | 8:95579787-99567648                      | 3.99         | Amp         | 0.045                 | 0.030        | 1.50        | 0.135        |       |       |
|                                           |                        |                               |                                   | <b>8:100144058-100907359<sup>§</sup></b> | <b>0.76</b>  | <b>Amp</b>  | <b>0.055</b>          | <b>0.030</b> | <b>1.87</b> | <b>0.063</b> |       |       |
|                                           |                        |                               |                                   | <b>8:100907360-140610028<sup>§</sup></b> | <b>39.70</b> | <b>Amp</b>  | <b>0.070</b>          | <b>0.028</b> | <b>2.49</b> | <b>0.013</b> |       |       |
|                                           |                        |                               |                                   | <b>8:140610029-143946427<sup>§</sup></b> | <b>3.34</b>  | <b>Amp</b>  | <b>0.052</b>          | <b>0.030</b> | <b>1.74</b> | <b>0.082</b> |       |       |
|                                           |                        |                               | Ovarian                           | 8:65946564-115168901                     | 49.22        | Amp         | -0.144                | 0.061        | -2.38       | 0.018        |       |       |
|                                           |                        |                               |                                   | 8:115168902-146364021                    | 31.20        | Amp         | -0.076                | 0.077        | -0.98       | 0.326        |       |       |
|                                           |                        |                               | Lung                              | 8:93539199-143507187                     | 49.97        | Amp         | -0.045                | 0.040        | -1.12       | 0.262        |       |       |
|                                           |                        |                               |                                   | 8:143507188-146364021                    | 2.86         | Amp         | -0.048                | 0.027        | -1.80       | 0.073        |       |       |
|                                           |                        |                               | Kidney                            | 8:130667622-130732818                    | 0.07         | Amp         | -0.001                | 0.027        | -0.02       | 0.983        |       |       |
|                                           |                        |                               | 11q22.3                           | 11:108993953-109543386                   | Del          | Endometrial | 11:83791774-120931054 | 37.14        | Del         | -0.025       | 0.019 | -1.32 |
| Ovarian                                   | NA                     | NA                            |                                   |                                          |              | NA          | NA                    | NA           | NA          | NA           |       |       |
| Lung                                      | 11:104239997-113587551 | 9.35                          |                                   |                                          |              | Del         | -0.012                | 0.031        | -0.40       | 0.692        |       |       |
| Kidney                                    | NA                     | NA                            |                                   |                                          |              | NA          | NA                    | NA           | NA          | NA           |       |       |

13q12.3-q21.13:31949050-59628349

Del

|             |                                          |              |     |               |              |              |              |
|-------------|------------------------------------------|--------------|-----|---------------|--------------|--------------|--------------|
| Endometrial | <b>13:31392655-46090461</b> <sup>§</sup> | <b>14.70</b> | Del | <b>-0.039</b> | <b>0.023</b> | <b>-1.68</b> | <b>0.094</b> |
|             | 13:46090462-50019374                     | 3.93         | Del | -0.028        | 0.025        | -1.12        | 0.261        |
|             | 13:50019375-61187197                     | 11.17        | Del | -0.031        | 0.024        | -1.31        | 0.192        |
| Ovarian     | <b>13:31158332-40490760</b> <sup>§</sup> | <b>9.33</b>  | Del | <b>-0.169</b> | <b>0.067</b> | <b>-2.52</b> | <b>0.012</b> |
|             | 13:40490761-40716260                     | 0.23         | Del | -0.113        | 0.071        | -1.59        | 0.113        |
|             | <b>13:40716261-51631042</b> <sup>§</sup> | <b>10.91</b> | Del | <b>-0.138</b> | <b>0.068</b> | <b>-2.03</b> | <b>0.043</b> |
|             | 13:51631043-56802296                     | 5.17         | Del | -0.097        | 0.070        | -1.39        | 0.164        |
| Lung        | 13:19650694-85435149                     | 65.78        | Del | 0.020         | 0.031        | 0.64         | 0.522        |
| Kidney      | NA                                       | NA           | NA  | NA            | NA           | NA           | NA           |

Abbreviations - AA=African American; Amp=Amplification; Del=Deletion; EA=European American; NA = no recurrent SCNAs were identified by Gistic2; SE=Standard error of the coefficient.

\* The following four tumor types were evaluated along with their sample sizes - Endometrial (N: AA=102, EA=360); Ovarian (N: AA=31, EA=453); Lung (N: AA=80, EA=735); Kidney (N: AA=118, EA=711).

† positive beta coefficient signifies greater DNA Amplification in AA relative to EA.

- negative beta coefficient signifies greater DNA Deletion in AA relative to EA.

‡ Based on human genome build hg19

§ SCNAs where significant race difference coefficients were consistent in direction with the breast and prostate cancer results (i.e, more extreme gain and loss in AA compared to EA).
