# Supplementary material for: Breast and prostate cancers harbor common somatic copy number alterations that consistently differ by race and are associated with survival
Source: PubMed Central journal article supplement (PMC7441621; doi:10.1186/s12920-020-00765-2), 2020-08-20
Supplement: 12920_2020_765_MOESM5_ESM.pdf [file 12920_2020_765_MOESM5_ESM.pdf]

**Table S4. Association of regional chromosomal African ancestry with SCNAs among African Americans in the six regions where African Americans had higher magnitude SCNAs relative to European Americans in both prostate and breast tumors.**

| Chromosome number: base pair<br>position start-end* | Length<br>(Mb) | SCNA<br>type | Cytoband      | AA Breast TCGA Tumors |       |                 |             | AA Prostate TCGA Tumors |       |                 |             |
|-----------------------------------------------------|----------------|--------------|---------------|-----------------------|-------|-----------------|-------------|-------------------------|-------|-----------------|-------------|
|                                                     |                |              |               | Beta<br>Coefficient†  | SE    | T-<br>statistic | P-<br>value | Beta<br>Coefficient†    | SE    | T-<br>statistic | P-<br>value |
| 5:51204966-80506380                                 | 29.3           | Del          | q11.2-q14.1   | 0.111                 | 0.098 | 1.13            | 0.259       | 0.260                   | 0.227 | 1.14            | 0.260       |
| 5:94139355-102688824                                | 8.55           | Del          | q15-q21.1     | 0.076                 | 0.067 | 1.12            | 0.264       | -0.065                  | 0.363 | -0.18           | 0.858       |
| 8:78097650-84211555                                 | 6.11           | Amp          | q21.11-q21.13 | 0.013                 | 0.120 | 0.11            | 0.911       | -0.003                  | 0.167 | -0.02           | 0.986       |
| 8:90059223-144568457                                | 54.51          | Amp          | q21.3-q24.3   | 0.061                 | 0.183 | 0.34            | 0.737       | 0.438                   | 0.364 | 1.20            | 0.237       |
| 11:108993953-109543386                              | 0.55           | Del          | q22.3         | 0.004                 | 0.087 | 0.05            | 0.960       | 0.097                   | 0.158 | 0.62            | 0.542       |
| 13:31949050-59628349                                | 27.68          | Del          | q12.3-q21.3   | -0.011                | 0.111 | -0.10           | 0.924       | -0.016                  | 0.156 | -0.10           | 0.921       |

Abbreviations: SCNA=somatic copy number alteration; Del=deletion; Amp=amplification; AA=African American; SE=standard error of the beta coefficient.

\*Based on human genome build hg19

† Beta coefficient for the "regional ancestry" term in the linear model "cnAUC=regional ancestry+age+tumor pathology+ genome wide ancestry "

In amplified regions, a positive beta coefficient indicates that higher degree of amplification is associated with increasing African ancestry within the SCNA.

In deletion regions, a negative beta coefficient indicates that a higher degree of amplification is associated with increasing African ancestry within the SCNA.
