# Supplementary material for: Breast and prostate cancers harbor common somatic copy number alterations that consistently differ by race and are associated with survival
Source: PubMed Central journal article supplement (PMC7441621; doi:10.1186/s12920-020-00765-2), 2020-08-20
Supplement: 12920_2020_765_MOESM8_ESM.pdf [file 12920_2020_765_MOESM8_ESM.pdf]

**Table S7. Gene-level copy number associations with expression of 18 genes differentially expressed by race in breast and prostate tumors**

| Gene Symbol    | Cytoband | Breast Tumors     |             |           |                  | Prostate Tumors   |             |          |                  |
|----------------|----------|-------------------|-------------|-----------|------------------|-------------------|-------------|----------|------------------|
|                |          | Beta coefficient* | T-statistic | P value   | FDR <sup>†</sup> | Beta coefficient* | T-statistic | P value  | FDR <sup>†</sup> |
| TOP1MT         | 8q24.3   | 0.53              | 15.16       | 2.65E-46  | <b>7.94E-46</b>  | 0.44              | 7.55        | 5.33E-13 | <b>1.07E-12</b>  |
| GLI4           | 8q24.3   | 0.51              | 10.63       | 6.63E-25  | <b>1.08E-24</b>  | 0.48              | 7.29        | 2.75E-12 | <b>4.96E-12</b>  |
| RB1            | 13q14.2  | 0.67              | 14.75       | 3.53E-44  | <b>9.06E-44</b>  | 0.29              | 9.38        | 1.70E-18 | <b>5.09E-18</b>  |
| GUSBP3         | 5q13     | 1.12              | 14.04       | 1.40E-40  | <b>3.15E-40</b>  | 0.41              | 4.32        | 2.12E-05 | <b>2.94E-05</b>  |
| KBTBD7         | 13q14.11 | 0.56              | 8.95        | 2.14E-18  | <b>3.21E-18</b>  | 0.32              | 6.13        | 2.82E-09 | <b>4.24E-09</b>  |
| MARVELD2       | 5q13.2   | 0.69              | 13.42       | 1.70E-37  | <b>3.40E-37</b>  | 0.45              | 7.78        | 1.15E-13 | <b>2.59E-13</b>  |
| KBTBD6         | 13q14.11 | 0.49              | 15.82       | 8.21E-50  | <b>3.69E-49</b>  | 0.36              | 10.06       | 1.08E-20 | <b>4.84E-20</b>  |
| OCLN           | 5q13.2   | 0.50              | 7.29        | 6.83E-13  | <b>9.46E-13</b>  | 0.37              | 4.09        | 5.58E-05 | <b>6.69E-05</b>  |
| ARSB           | 5q14.1   | -0.01             | -0.16       | 0.869     | 0.869            | 0.38              | 6.23        | 1.60E-09 | <b>2.61E-09</b>  |
| WISP1          | 8q24.22  | -0.01             | -0.22       | 0.824     | 0.869            | -0.07             | -0.70       | 0.485    | 0.494            |
| PVT1           | 8q24.21  | 0.61              | 15.63       | 7.98E-49  | <b>2.87E-48</b>  | 0.56              | 7.83        | 8.65E-14 | <b>2.22E-13</b>  |
| SOHLH2         | 13q13.3  | 0.46              | 4.29        | 2.01E-05  | <b>2.58E-05</b>  | 0.96              | 4.11        | 5.06E-05 | <b>6.50E-05</b>  |
| MTERFD1/MTERF3 | 8q22.1   | 0.67              | 26.12       | 6.50E-112 | <b>1.17E-110</b> | 0.40              | 10.64       | 1.24E-22 | <b>7.41E-22</b>  |
| C11orf87       | 11q22.3  | 0.10              | 1.26        | 0.209     | 0.235            | -0.15             | -0.68       | 0.494    | 0.494            |
| CDADC1         | 13q14.2  | 0.43              | 17.42       | 1.19E-58  | <b>7.15E-58</b>  | 0.34              | 13.58       | 4.60E-33 | <b>4.14E-32</b>  |
| SNX31          | 8q22.3   | 0.18              | 2.10        | 0.036     | <b>0.043</b>     | 0.44              | 2.34        | 0.020    | <b>0.023</b>     |
| SUGT1          | 13q14.3  | 0.45              | 18.98       | 1.12E-67  | <b>1.01E-66</b>  | 0.34              | 15.37       | 1.04E-39 | <b>1.87E-38</b>  |
| PELO           | 5q11.2   | 0.30              | 13.29       | 7.05E-37  | <b>1.27E-36</b>  | 0.36              | 9.97        | 2.08E-20 | <b>7.49E-20</b>  |

Abbreviations: AA=African American; EA=European American; FDR=False Discovery Rate

\* log<sub>2</sub>.Fold.Change is the log<sub>2</sub>(expression in AA Tumors/expression in EA Tumors).

† Adjusted pvalue using Benjamini-Hochberg False Discovery Rate method.
