# Supplementary material for: Breast and prostate cancers harbor common somatic copy number alterations that consistently differ by race and are associated with survival
Source: PubMed Central journal article supplement (PMC7441621; doi:10.1186/s12920-020-00765-2), 2020-08-20
Supplement: 12920_2020_765_MOESM13_ESM.pdf [file 12920_2020_765_MOESM13_ESM.pdf]

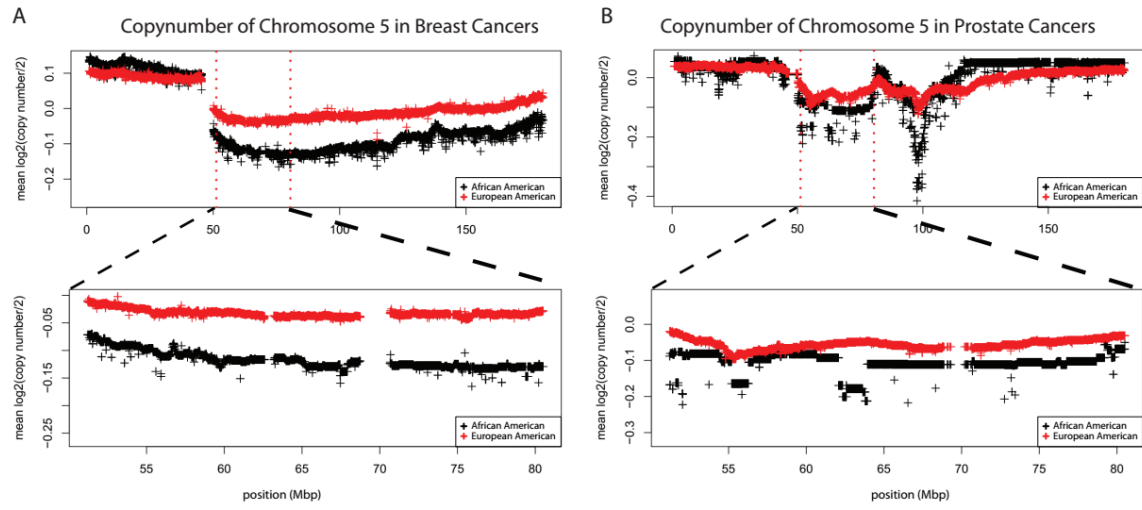

**Figure S5:**
